# Supplementary material
Source: Springer Nature journal article supplement (https://www.springermedizin.de/resource/supplementary/12943_2011_998_MOESM3_ESM.PDF/9552040)
Supplement: MOESM3 [file 9552040]

### Additional file 3:

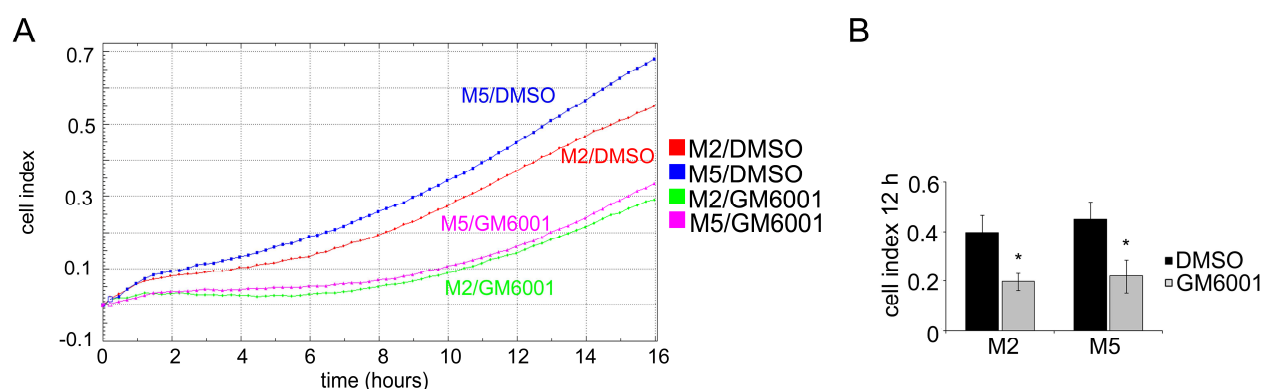

### Figure S3. c-Myb-induced Matrigel invasion is sensitive to the MMP inhibitor GM6001.

MDA-MB-231MYBup cells (M2, M5) were starved in the serum-free medium for 8 h and processed for cell invasion assay as described in the Material and Methods. The membranes were coated with the diluted Matrigel. The broad-spectrum MMP inhibitor GM6001 (Sigma) at final concentration 20  $\mu$ M or DMSO was added to the bottom and upper chambers of indicated wells of CIM-plate 16. The bottom chambers were filled with complete medium containing 10% FCS as a chemoattractant. **(A)** The chart shows the representative outcomes of kinetics analysis of Matrigel invasion. **(B)** The columns show the average cell indexes in certain time points (12 h) from three independent measurements. Error bars indicate standard deviations. Asterisks indicate significant ( $p < 0.05$ ) differences in Matrigel invasion of the GM6001-treated MDA-MB-231MYBup cells and DMSO-treated MDA-MB-231MYBup controls as determined by the  $t$ -test.
